# Supplementary material for: The relationship between IL-6 levels and the angiographic severity of coronary artery disease following percutaneous coronary intervention in acute coronary syndrome patients
Source: PubMed Central journal article supplement (PMC8642871; doi:10.1186/s12872-021-02406-7), 2021-12-03

**A**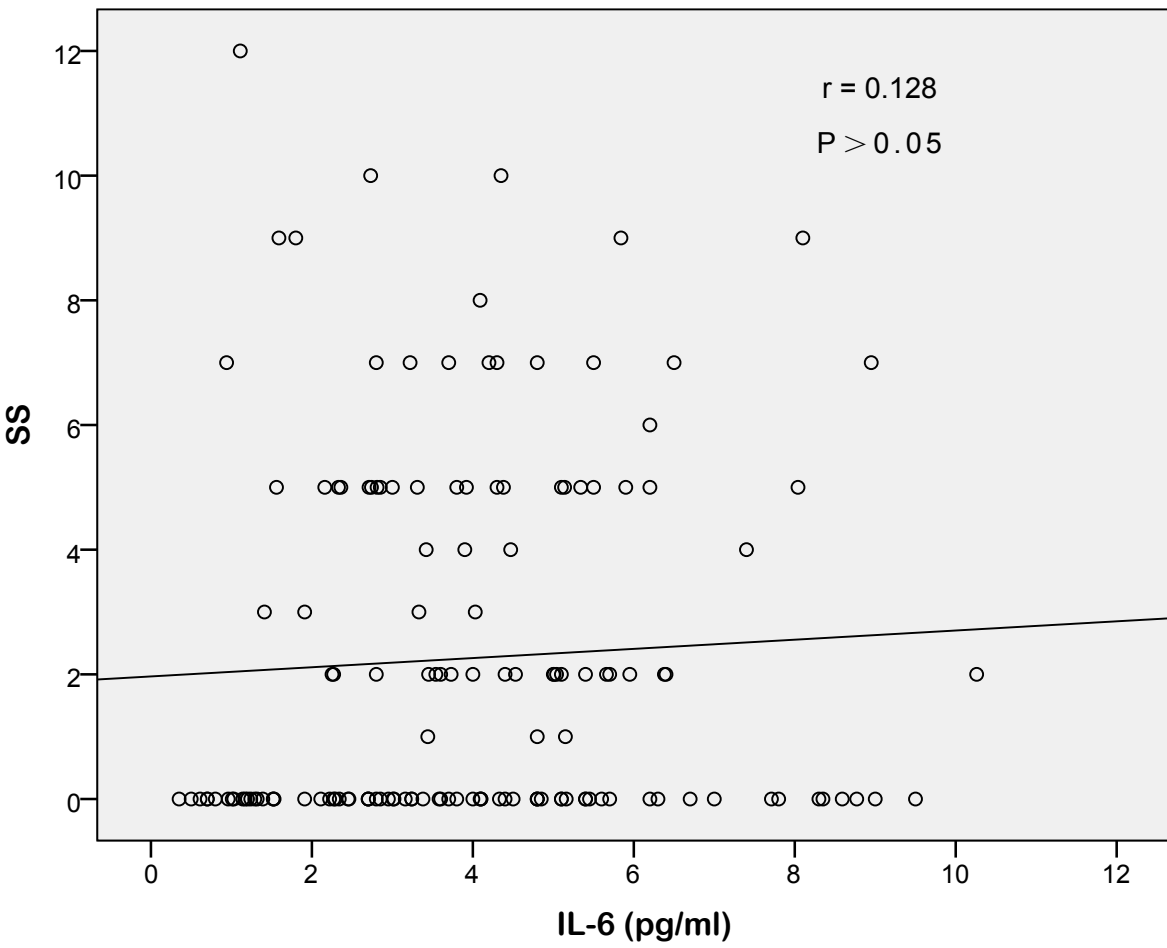**B**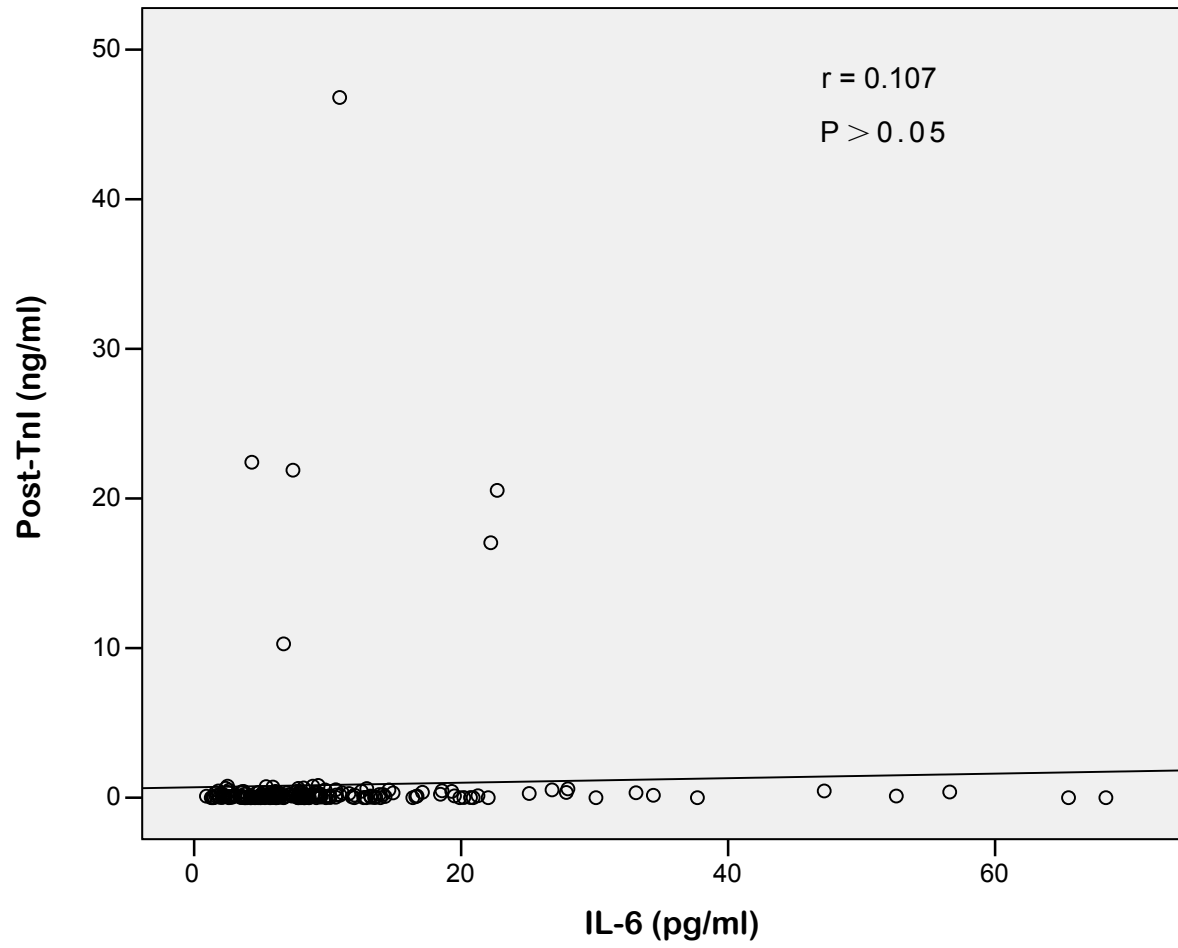

Supplement: 12872_2021_2406_MOESM1_ESM.pdf [file 12872_2021_2406_MOESM1_ESM.pdf]
